# Supplementary material for: Efficacy of Dapagliflozin on Renal Function and Outcomes in Patients With Heart Failure With Reduced Ejection Fraction: Results of DAPA-HF
Source: PubMed Central journal article supplement — Circulation. 2020 Oct 12;143(4):298–309. doi: 10.1161/CIRCULATIONAHA.120.050391 (PMC7834909; doi:10.1161/circulationaha.120.050391), 2020-10-12
Supplement: cir-143-298-s001.pdf [file cir-143-298-s001.pdf]

# SUPPLEMENTAL MATERIAL

Figure I: Effect of dapagliflozin on the primary and secondary outcomes in DAPA-HF according eGFR group at baseline (\*rate ratio and N provided for total hospitalizations or CV death outcome).

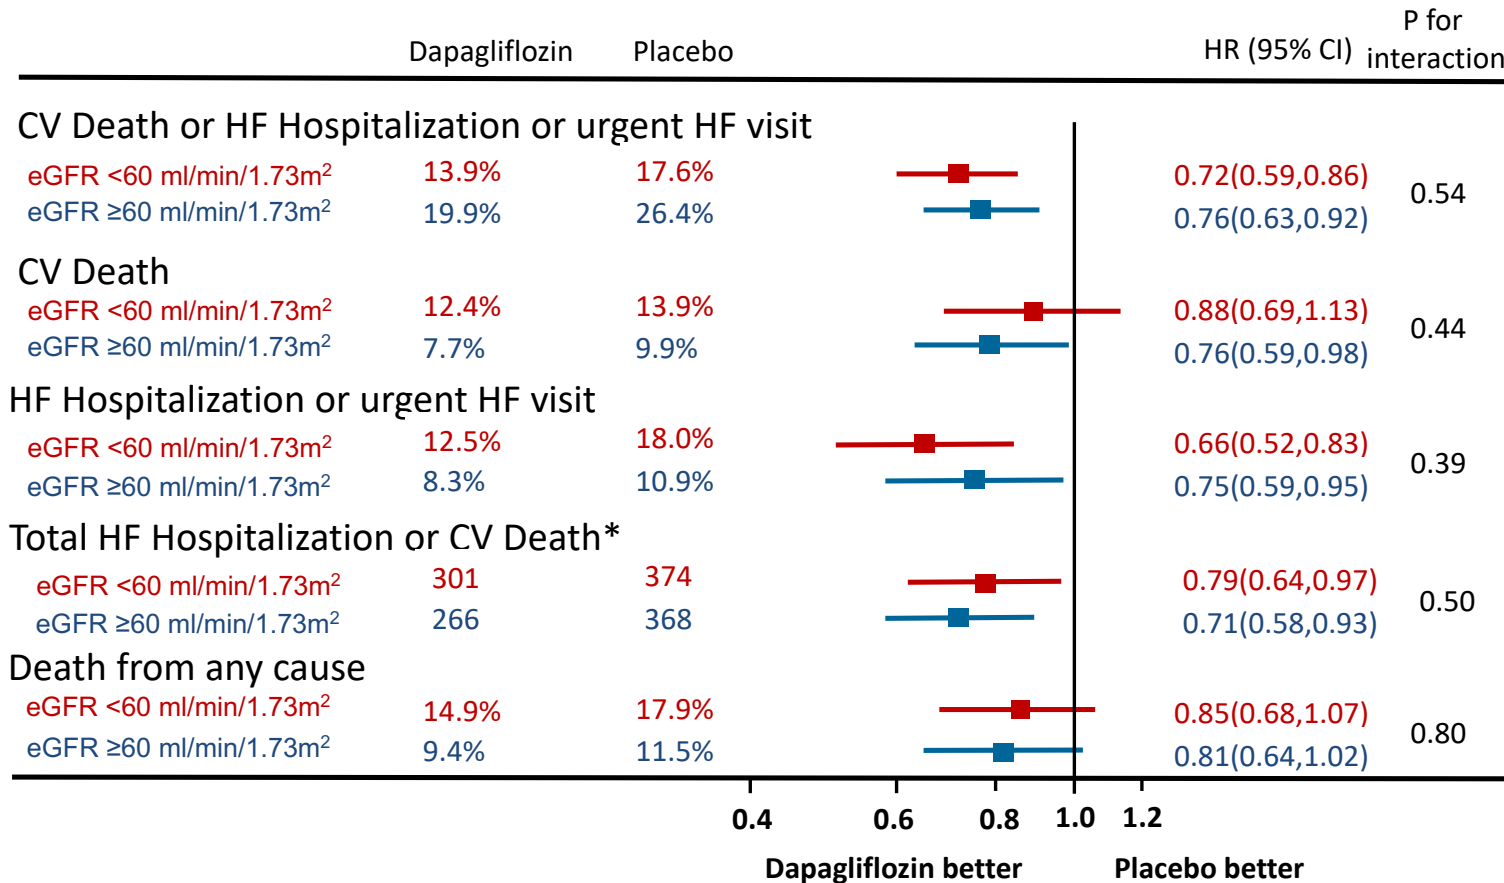

Figure II – Effect of dapagliflozin on secondary outcomes in DAPA-HF by baseline eGFR A. CV death B. HF hospitalization/Urgent HF visit C. All cause death

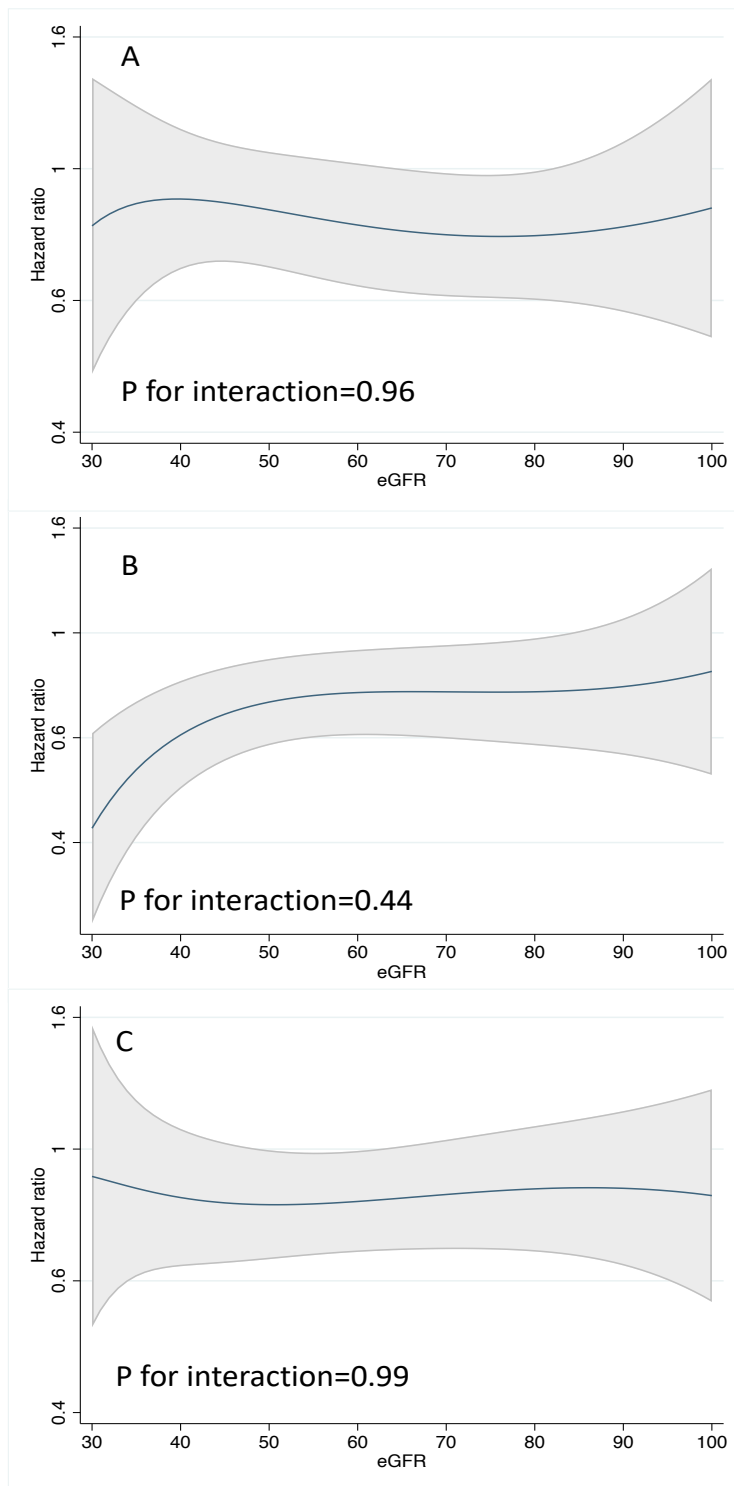

Figure III Kaplan Meier estimates of the effect of dapagliflozin on the renal composite endpoint by baseline CKD status

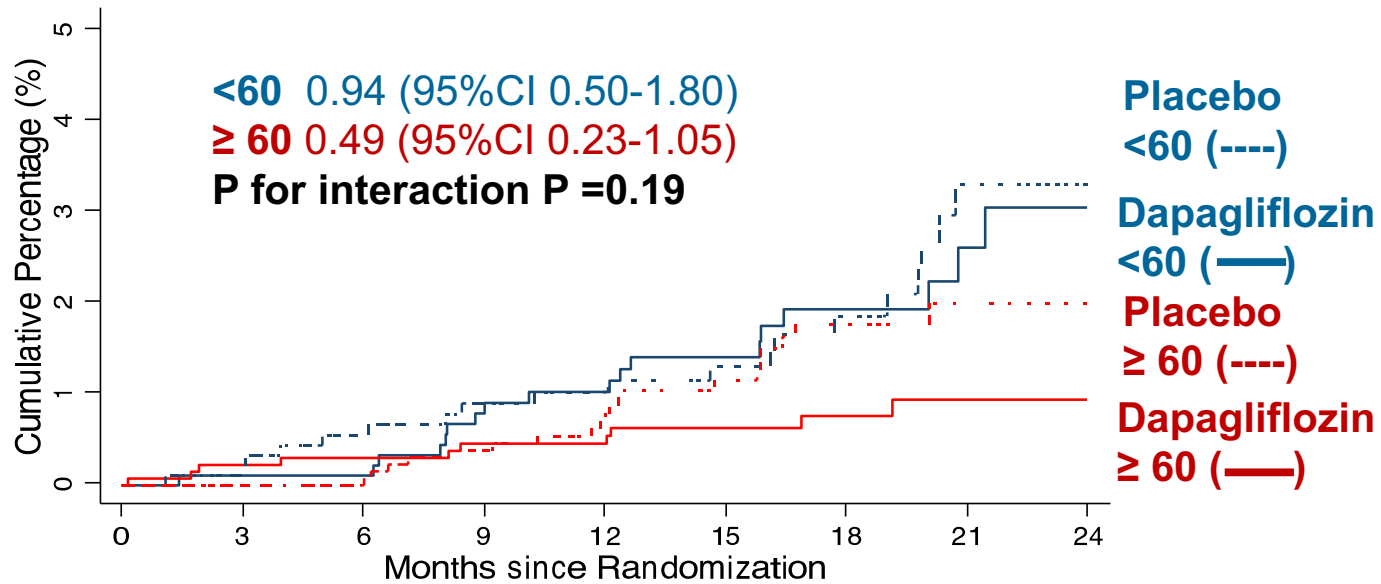

| Number at Risk    | 0    | 3    | 6    | 9    | 12   | 15  | 18  | 21  | 24  |
|-------------------|------|------|------|------|------|-----|-----|-----|-----|
| Dapagliflozin <60 | 962  | 931  | 897  | 855  | 795  | 632 | 460 | 248 | 84  |
| Dapagliflozin ≥60 | 1410 | 1363 | 1329 | 1286 | 1213 | 938 | 693 | 374 | 139 |
| Placebo <60       | 964  | 914  | 875  | 837  | 776  | 625 | 472 | 262 | 91  |
| Placebo ≥60       | 1406 | 1362 | 1325 | 1280 | 1199 | 912 | 660 | 338 | 124 |

Figure IV Kaplan Meier estimates of the effect of dapagliflozin on the renal composite endpoint by baseline diabetes status

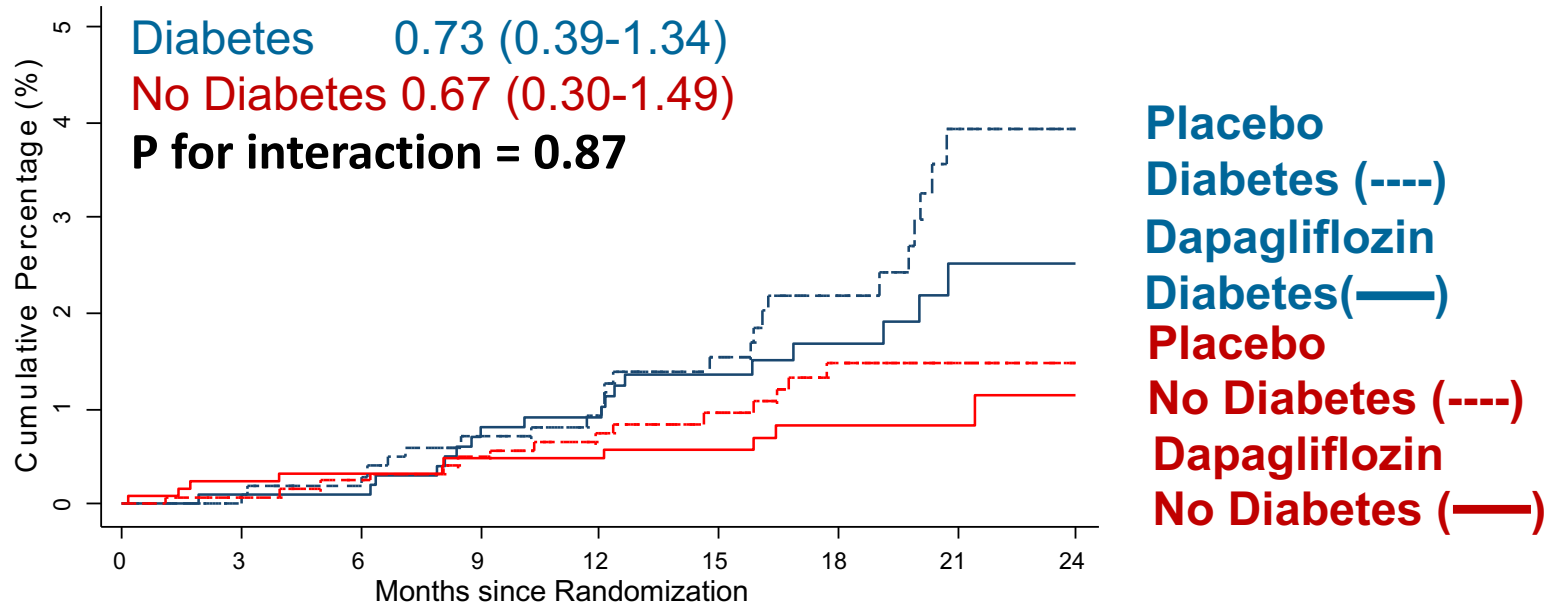

| Number at Risk            |      | 0    | 3    | 6    | 9    | 12  | 15  | 18  | 21  | 24 |
|---------------------------|------|------|------|------|------|-----|-----|-----|-----|----|
| Dapagliflozin Diabetes    | 1075 | 1042 | 1013 | 969  | 900  | 696 | 511 | 276 | 103 |    |
| Dapagliflozin No Diabetes | 1297 | 1252 | 1213 | 1172 | 1108 | 874 | 642 | 346 | 120 |    |
| Placebo Diabetes          | 1064 | 1028 | 991  | 935  | 861  | 674 | 493 | 255 | 92  |    |
| Placebo No Diabetes       | 1306 | 1248 | 1209 | 1182 | 1114 | 863 | 639 | 345 | 123 |    |

Figure V. Kaplan Meier estimate of pre-specified outcome of doubling of serum creatinine from previous measurement in patients randomized to dapagliflozin and placebo

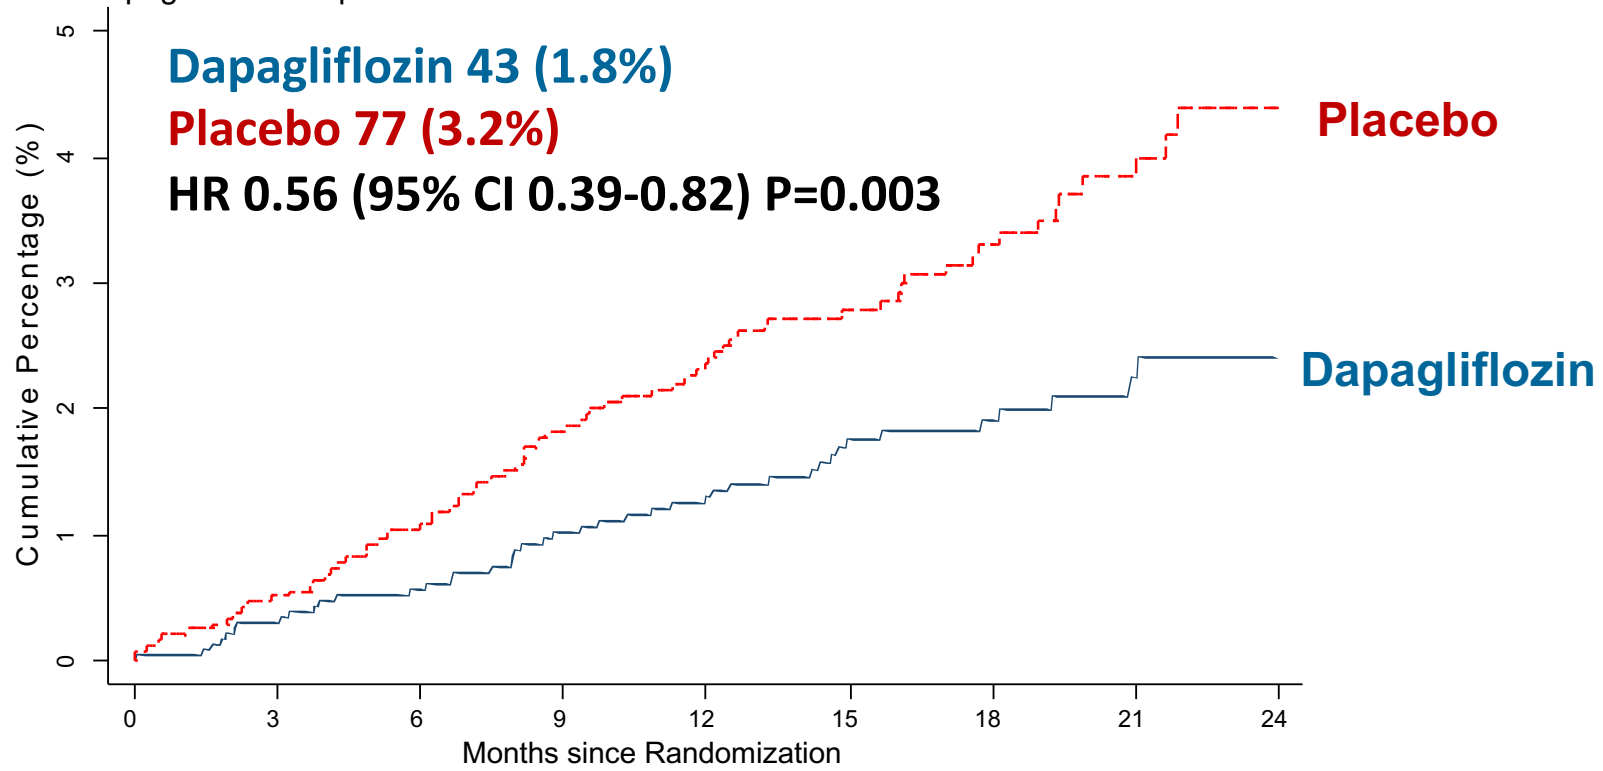

Number at Risk

|               |      |      |      |      |      |      |      |     |     |
|---------------|------|------|------|------|------|------|------|-----|-----|
| Dapagliflozin | 2373 | 2290 | 2221 | 2136 | 2002 | 1566 | 1152 | 622 | 222 |
| Placebo       | 2371 | 2267 | 2189 | 2105 | 1957 | 1522 | 1122 | 599 | 215 |

Figure VI: Effect of dapagliflozin on change in eGFR over time (slope per ml/min/1.73m<sup>2</sup> per year) by baseline eGFR group in DAPA-HF.

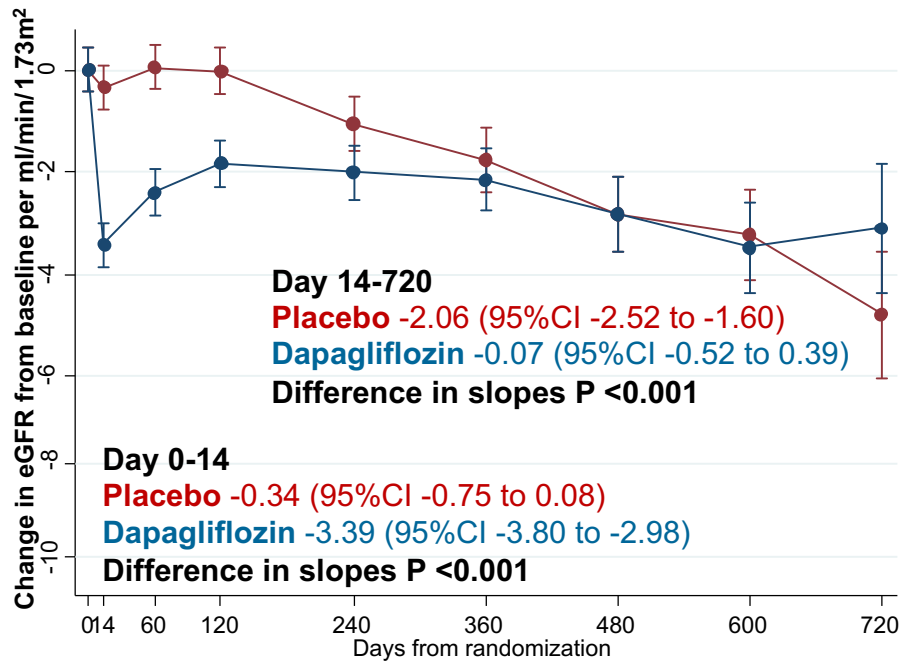

eGFR <60 at Baseline

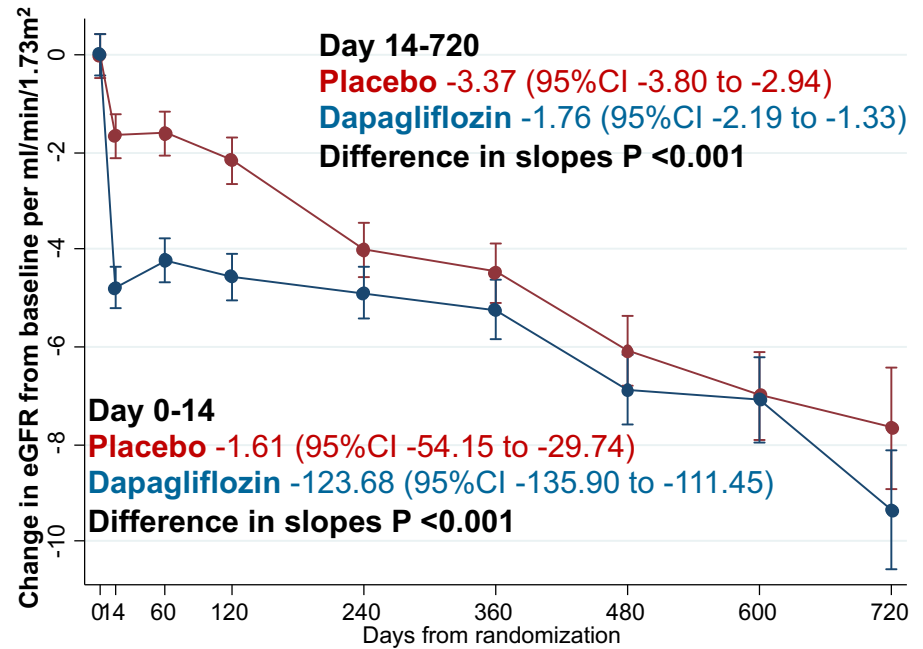

eGFR ≥60 at Baseline

P for interaction = 0.94
